# Supplementary material for: Gestational Age Assessment in the Ghana Randomized Air Pollution and Health Study (GRAPHS): Ultrasound Capacity Building, Fetal Biometry Protocol Development, and Ongoing Quality Control
Source: PubMed Central journal article supplement (PMC4376157; doi:10.2196/resprot.3797), 2014-12-18
Supplement: resprot_v3i4e77_app1.pdf [file resprot_v3i4e77_app1.pdf]

| <b>Ghana Randomized Air<br/>Pollution Health Study</b> |                  |      |  |           |      |         |
|--------------------------------------------------------|------------------|------|--|-----------|------|---------|
|                                                        | ULTRASONOGRAPHY  |      |  | Haruna    |      |         |
|                                                        | PARTICIPANT ID   |      |  | BM00296   |      |         |
|                                                        | DATE OF THE SCAN |      |  | S         |      |         |
|                                                        |                  |      |  | 30-Jul-13 |      |         |
|                                                        | EDD BY TRIAL OB  |      |  | 21-Nov-13 |      |         |
|                                                        | Weeks            | Days |  | Weeks     | Days | AVERAGE |
| BPD                                                    | 23               | 4    |  | 23        | 3    | 23 4/7  |
| FL                                                     | 23               | 3    |  | 23        | 6    | 23 5/7  |
| TOTAL AVERAGE                                          |                  |      |  |           |      | 23 5/7  |

## **Appendix 1: Representative Sample of Ultrasound Summary Report**
